# Supplementary material for: Genome-Wide Investigation of Maximum Habitual Alcohol Intake in US Veterans in Relation to Alcohol Consumption Traits and Alcohol Use Disorder
Source: PubMed Central journal article supplement (PMC9614582; doi:10.1001/jamanetworkopen.2022.38880), 2022-10-27
Supplement: jamanetwopen-e2238880-s003.pdf [file jamanetwopen-e2238880-s003.pdf]

| <b>*Group Name(s): The Million Veteran Program</b> |                   |                              |                         |                                      |                                                 |                                                                              |                                                                                                   |
|----------------------------------------------------|-------------------|------------------------------|-------------------------|--------------------------------------|-------------------------------------------------|------------------------------------------------------------------------------|---------------------------------------------------------------------------------------------------|
| <b>*First Name and Middle Initial(s)</b>           | <b>*Last Name</b> | <b>*Suffix (eg, Jr, III)</b> | <b>Academic Degrees</b> | <b>Institution</b>                   | <b>Location (city, state/province, country)</b> | <b>Role or Contribution, eg, chair, principal investigator</b>               | <b>Group (if more than 1 Group listed in the byline) and/or Subgroup (eg, Steering Committee)</b> |
| Sumitra                                            | Muralidhar        |                              | Ph.D.                   | US Department of Veterans Affairs    | Washington, DC                                  | Program Director                                                             | MVP Program Office                                                                                |
| Jennifer                                           | Moser             |                              | Ph.D.                   | US Department of Veterans Affairs    | Washington, DC                                  | Associate Director, Scientific Programs                                      | MVP Program Office                                                                                |
| Jennifer E.                                        | Deen              |                              | B.S.                    | US Department of Veterans Affairs    | Washington, DC                                  | Associate Director, Cohort Management & Public Relations                     | MVP Program Office                                                                                |
| J. Michael                                         | Gaziano           |                              | M.D., M.P.H.            | VA Boston Healthcare System          | Boston, MA                                      | Co-Chair                                                                     | MVP Executive Committee                                                                           |
| Sumitra                                            | Muralidhar        |                              | Ph.D.                   | US Department of Veterans Affairs    | Washington, DC                                  | Co-Chair                                                                     | MVP Executive Committee                                                                           |
| Jean                                               | Beckham           |                              | Ph.D.                   | Durham VA Medical Center             | Durham, NC                                      | Committee member                                                             | MVP Executive Committee                                                                           |
| Kyong-Mi                                           | Chang             |                              | M.D.                    | Philadelphia VA Medical Center       | Philadelphia, PA                                | Committee member                                                             | MVP Executive Committee                                                                           |
| Philip S                                           | Tsao              |                              | Ph.D.                   | VA Palo Alto Health Care System      | Palo Alto, CA                                   | Committee member                                                             | MVP Executive Committee                                                                           |
| Shiuh-Wen                                          | Luoh              |                              | M.D., Ph.D.             | VA Portland Health Care System       | Portland, OR                                    | Committee member                                                             | MVP Executive Committee                                                                           |
| Juan P.                                            | Casas             |                              | M.D., Ph.D.             | VA Boston Healthcare System          | Boston, MA                                      | Committee member                                                             | MVP Executive Committee                                                                           |
| Juan P.                                            | Casas             |                              | M.D., Ph.D.             | VA Boston Healthcare System          | Boston, MA                                      | Executive Director                                                           | MVP Operations                                                                                    |
| Lori                                               | Churby            |                              | B.S.                    | VA Palo Alto Health Care System      | Palo Alto, CA                                   | Director of Regulatory Affairs                                               | MVP Operations                                                                                    |
| Stacey B.                                          | Whitbourne        |                              | Ph.D.                   | VA Boston Healthcare System          | Boston, MA                                      | MVP Cohort Management Director                                               | MVP Operations                                                                                    |
| Jessica V.                                         | Brewer            |                              | M.P.H.                  | VA Boston Healthcare System          | Boston, MA                                      | MVP Recruitment/Enrollment Director                                          | MVP Operations                                                                                    |
| Mary T.                                            | Brophy            |                              | M.D., M.P.H.            | VA Boston Healthcare System          | Boston, MA                                      | Director, VA Central Biorepository                                           | MVP Operations                                                                                    |
| Luis E.                                            | Selva             |                              | Ph.D.                   | VA Boston Healthcare System          | Boston, MA                                      | Executive Director for MVP Biorepositories                                   | MVP Operations                                                                                    |
| Shahpoor                                           | Shayan            |                              | M.S.                    | VA Boston Healthcare System          | Boston, MA                                      | MVP Informatics                                                              | MVP Operations                                                                                    |
| Kelly                                              | Cho               |                              | Ph.D., M.P.H.,          | VA Boston Healthcare System          | Boston, MA                                      | Director, MVP Data Operations/Analytics                                      | MVP Operations                                                                                    |
| Saiju                                              | Pyarajan          |                              | Ph.D.                   | VA Boston Healthcare System          | Boston, MA                                      | Director, Center for Computational and Data Science (C-DACS) & Genomics Core | MVP Operations                                                                                    |
| Philip S                                           | Tsao              |                              | Ph.D.                   | VA Palo Alto Health Care System      | Palo Alto, CA                                   | Director, Molecular Data Core                                                | MVP Operations                                                                                    |
| Kelly                                              | Cho               |                              | Ph.D., M.P.H.,          | VA Boston Healthcare System          | Boston, MA                                      | Director, Phenomics Data Core                                                | MVP Operations                                                                                    |
| Scott L.                                           | DuVall            |                              | Ph.D.                   | VA Salt Lake City Health Care System | Salt Lake City, UT                              | Director, VA Informatics and Computing Infrastructure (VINCI)                | MVP Operations                                                                                    |
| Todd A.                                            | Connor            |                              | Pharm.D.                | New Mexico VA Health Care System     | Albuquerque, NM                                 | Cooperative Studies Program Clinical Research Pharmacy Coordinating Center   | MVP Operations                                                                                    |
| Dean P.                                            | Argyres           |                              | B.S., M.S.              | New Mexico VA Health Care System     | Albuquerque, NM                                 | Cooperative Studies Program Clinical Research Pharmacy Coordinating Center   | MVP Operations                                                                                    |
| Mihaela                                            | Aslan             |                              | Ph.D.                   | VA Boston Healthcare System          | Boston, MA                                      | Clinical Epidemiology Research Center (CERC) Coordinator                     | MVP Recruitment/Enrollment                                                                        |
| Philip S                                           | Tsao              |                              | Ph.D.                   | VA Palo Alto Health Care System      | Palo Alto, CA                                   | Genomics Coordinating Center, Palo Alto                                      | MVP Recruitment/Enrollment                                                                        |
| J. Michael                                         | Gaziano           |                              | M.D., M.P.H.            | VA Boston Healthcare System          | Boston, MA                                      | MVP Boston Coordinating Center, Boston                                       | MVP Recruitment/Enrollment                                                                        |
| Brady                                              | Stephens          |                              | M.S.                    | Canandaigua VA Medical Center        | Canandaigua, NY                                 | MVP Information Center, Canandaigua                                          | MVP Recruitment/Enrollment                                                                        |
| John                                               | Concato           |                              | M.D., M.P.H.            | VA Connecticut Healthcare System     | West Haven, CT                                  | Committee member                                                             | CSP#575B Executive Committee                                                                      |
| J. Michael                                         | Gaziano           |                              | M.D., M.P.H.            | VA Boston Healthcare System          | Boston, MA                                      | Committee member                                                             | CSP#575B Executive Committee                                                                      |
| Joel                                               | Gelernter         |                              | M.D.                    | VA Connecticut Healthcare System     | West Haven, CT                                  | Committee member                                                             | CSP#575B Executive Committee                                                                      |
| Terri                                              | Gleason           |                              | Ph.D.                   | US Department of Veterans Affairs    | Washington, DC                                  | Committee member                                                             | CSP#575B Executive Committee                                                                      |
| Grant D.                                           | Huang             |                              | Ph.D., M.P.H.,          | US Department of Veterans Affairs    | Washington, DC                                  | Committee member                                                             | CSP#575B Executive Committee                                                                      |
| Karestan C.                                        | Koenen            |                              | Ph.D.                   | Harvard Chan School of Public Health | Boston, MA                                      | Committee member                                                             | CSP#575B Executive Committee                                                                      |
| Christine                                          | Marx              |                              | M.D.                    | Durham VA Medical Center             | Durham, NC                                      | Committee member                                                             | CSP#575B Executive Committee                                                                      |
| Jennifer                                           | Moser             |                              | Ph.D.                   | US Department of Veterans Affairs    | Washington, DC                                  | Committee member                                                             | CSP#575B Executive Committee                                                                      |
| Krishnan                                           | Radhakrishnan     |                              | M.D.                    | VA Connecticut Healthcare System     | West Haven, CT                                  | Committee member                                                             | CSP#575B Executive Committee                                                                      |
| Nicholas                                           | Schork            |                              | Ph.D.                   | J Craig Venter Institute             | La Jolla, CA                                    | Committee member                                                             | CSP#575B Executive Committee                                                                      |
| Murray                                             | Stein             |                              | M.D., M.P.H.            | VA San Diego Healthcare System       | San Diego, CA                                   | Committee member                                                             | CSP#575B Executive Committee                                                                      |
| Hongyu                                             | Zhao              |                              | Ph.D.                   | VA Connecticut Healthcare System     | West Haven, CT                                  | Committee member                                                             | CSP#575B Executive Committee                                                                      |
| Joel                                               | Gelernter         |                              | M.D.                    | VA Connecticut Healthcare System     | West Haven, CT                                  | Study Co-Chair                                                               | CSP#575B Study Chairs' Offices                                                                    |
| Murray                                             | Stein             |                              | M.D., M.P.H.            | VA San Diego Healthcare System       | San Diego, CA                                   | Study Co-Chair                                                               | CSP#575B Study Chairs' Offices                                                                    |
| Joan                                               | Kaufman           |                              | Ph.D.                   | VA Connecticut Healthcare System     | West Haven, CT                                  | Member                                                                       | CSP#575B Study Chairs' Offices                                                                    |
| Yaira                                              | Nunez             |                              | B.S.                    | VA Connecticut Healthcare System     | West Haven, CT                                  | Member                                                                       | CSP#575B Study Chairs' Offices                                                                    |
| Robert H.                                          | Pietrzak          |                              | Ph.D.                   | VA Connecticut Healthcare System     | West Haven, CT                                  | Member                                                                       | CSP#575B Study Chairs' Offices                                                                    |
| Danielle                                           | Beck              |                              | M.P.H.                  | VA San Diego Healthcare System       | San Diego, CA                                   | Member                                                                       | CSP#575B Study Chairs' Offices                                                                    |
| Shada                                              | Cissell           |                              | LCSW                    | VA San Diego Healthcare System       | San Diego, CA                                   | Member                                                                       | CSP#575B Study Chairs' Offices                                                                    |
| Mihaela                                            | Aslan             |                              | Ph.D.                   | VA Connecticut Healthcare System     | West Haven, CT                                  | VA Clinical Epidemiology Research Center (CERC)                              | CSP Epidemiology Centers                                                                          |
| John                                               | Concato           |                              | M.D., M.P.H.            | VA Connecticut Healthcare System     | West Haven, CT                                  | VA Clinical Epidemiology Research Center (CERC)                              | CSP Epidemiology Centers                                                                          |
| Patricia                                           | Conutchfield      |                              | B.S.                    | VA Connecticut Healthcare System     | West Haven, CT                                  | VA Clinical Epidemiology Research Center (CERC)                              | CSP Epidemiology Centers                                                                          |
| William                                            | Lance             |                              | M.B.A., M.P.A., M.S.    | VA Connecticut Healthcare System     | West Haven, CT                                  | VA Clinical Epidemiology Research Center (CERC)                              | CSP Epidemiology Centers                                                                          |
| Kei-Hoi                                            | Cheung            |                              | Ph.D.                   | VA Connecticut Healthcare System     | West Haven, CT                                  | VA Clinical Epidemiology Research Center (CERC)                              | CSP Epidemiology Centers                                                                          |
| Yuli                                               | Li                |                              | M.S.                    | VA Connecticut Healthcare System     | West Haven, CT                                  | VA Clinical Epidemiology Research Center (CERC)                              | CSP Epidemiology Centers                                                                          |
| Ning                                               | Sun               |                              | Ph.D.                   | VA Connecticut Healthcare System     | West Haven, CT                                  | VA Clinical Epidemiology Research Center (CERC)                              | CSP Epidemiology Centers                                                                          |

| *First Name and Middle Initial(s) | *Last Name    | *Suffix (eg, Jr, III) | Academic Degrees           | Institution                       | Location (city, state/province, country) | Role or Contribution, eg, chair, principal investigator             | Group (if more than 1 Group listed in the byline) and/or Subgroup (eg, Steering Committee) |
|-----------------------------------|---------------|-----------------------|----------------------------|-----------------------------------|------------------------------------------|---------------------------------------------------------------------|--------------------------------------------------------------------------------------------|
| Quan                              | Chen          |                       | Ph.D.                      | VA Connecticut Healthcare System  | West Haven, CT                           | VA Clinical Epidemiology Research Center (CERC)                     | <b>CSP Epidemiology Centers</b>                                                            |
| Krishnan                          | Radhakrishnan |                       | M.D., Ph.D., M.P.H., C.P.H | VA Connecticut Healthcare System  | West Haven, CT                           | VA Clinical Epidemiology Research Center (CERC)                     | <b>CSP Epidemiology Centers</b>                                                            |
| Nallakkandi                       | Rajeevan      |                       | Ph.D.                      | VA Connecticut Healthcare System  | West Haven, CT                           | VA Clinical Epidemiology Research Center (CERC)                     | <b>CSP Epidemiology Centers</b>                                                            |
| Frederick                         | Sayward       |                       | Ph.D.                      | VA Connecticut Healthcare System  | West Haven, CT                           | VA Clinical Epidemiology Research Center (CERC)                     | <b>CSP Epidemiology Centers</b>                                                            |
| J. Michael                        | Gaziano       |                       | M.D., M.P.H.               | VA Boston Healthcare System       | Boston, MA                               | Massachusetts Veterans Epidemiology Research and Information Center | <b>CSP Epidemiology Centers</b>                                                            |
| Kelly                             | Cho           |                       | Ph.D., M.P.H.,             | VA Boston Healthcare System       | Boston, MA                               | Massachusetts Veterans Epidemiology Research and Information Center | <b>CSP Epidemiology Centers</b>                                                            |
| David R.                          | Gagnon        |                       | M.D., Ph.D                 | VA Boston Healthcare System       | Boston, MA                               | Massachusetts Veterans Epidemiology Research and Information Center | <b>CSP Epidemiology Centers</b>                                                            |
| Kelly                             | Harrington    |                       | Ph.D.                      | VA Boston Healthcare System       | Boston, MA                               | Massachusetts Veterans Epidemiology Research and Information Center | <b>CSP Epidemiology Centers</b>                                                            |
| Rachel                            | Quaden        |                       | M.A.                       | VA Boston Healthcare System       | Boston, MA                               | Massachusetts Veterans Epidemiology Research and Information Center | <b>CSP Epidemiology Centers</b>                                                            |
| Saiju                             | Pyarajan      |                       | Ph.D.                      | VA Boston Healthcare System       | Boston, MA                               | Massachusetts Veterans Epidemiology Research and Information Center | <b>CSP Epidemiology Centers</b>                                                            |
| Stacey B.                         | Whitbourne    |                       | Ph.D.                      | VA Boston Healthcare System       | Boston, MA                               | Massachusetts Veterans Epidemiology Research and Information Center | <b>CSP Epidemiology Centers</b>                                                            |
| Terri                             | Gleason       |                       | Ph.D.                      | US Department of Veterans Affairs | Washington, DC                           | Clinical Science Research and Development Service                   | <b>VA Office of Research and Development</b>                                               |
| Grant D.                          | Huang         |                       | Ph.D., M.P.H.,             | US Department of Veterans Affairs | Washington, DC                           | Cooperative Studies Program                                         | <b>VA Office of Research and Development</b>                                               |
| Jennifer                          | Moser         |                       | Ph.D.                      | US Department of Veterans Affairs | Washington, DC                           | Program Manager, Million Veteran Program                            | <b>VA Office of Research and Development</b>                                               |
| Sumitra                           | Muralidhar    |                       | Ph.D.                      | US Department of Veterans Affairs | Washington, DC                           | Million Veteran Program, Director                                   | <b>VA Office of Research and Development</b>                                               |
| Timothy                           | O'Leary       |                       | M.D., Ph.D.                | US Department of Veterans Affairs | Washington, DC                           | Chief Research and Development Officers                             | <b>VA Office of Research and Development</b>                                               |
| Rachel B                          | Ramoni        |                       | D.M.D., Sc.D               | US Department of Veterans Affairs | Washington, DC                           | Chief Research and Development Officers                             | <b>VA Office of Research and Development</b>                                               |
|                                   |               |                       |                            |                                   |                                          |                                                                     | <b>VA Office of Research and Development</b>                                               |
